# Supplementary material for: AMP-Activated Protein Kinase (AMPK) Regulates Energy Metabolism through Modulating Thermogenesis in Adipose Tissue
Source: PubMed Central journal article supplement (PMC5826329; doi:10.3389/fphys.2018.00122), 2018-02-21
Supplement: Presentation2.pdf [file Presentation2.pdf]

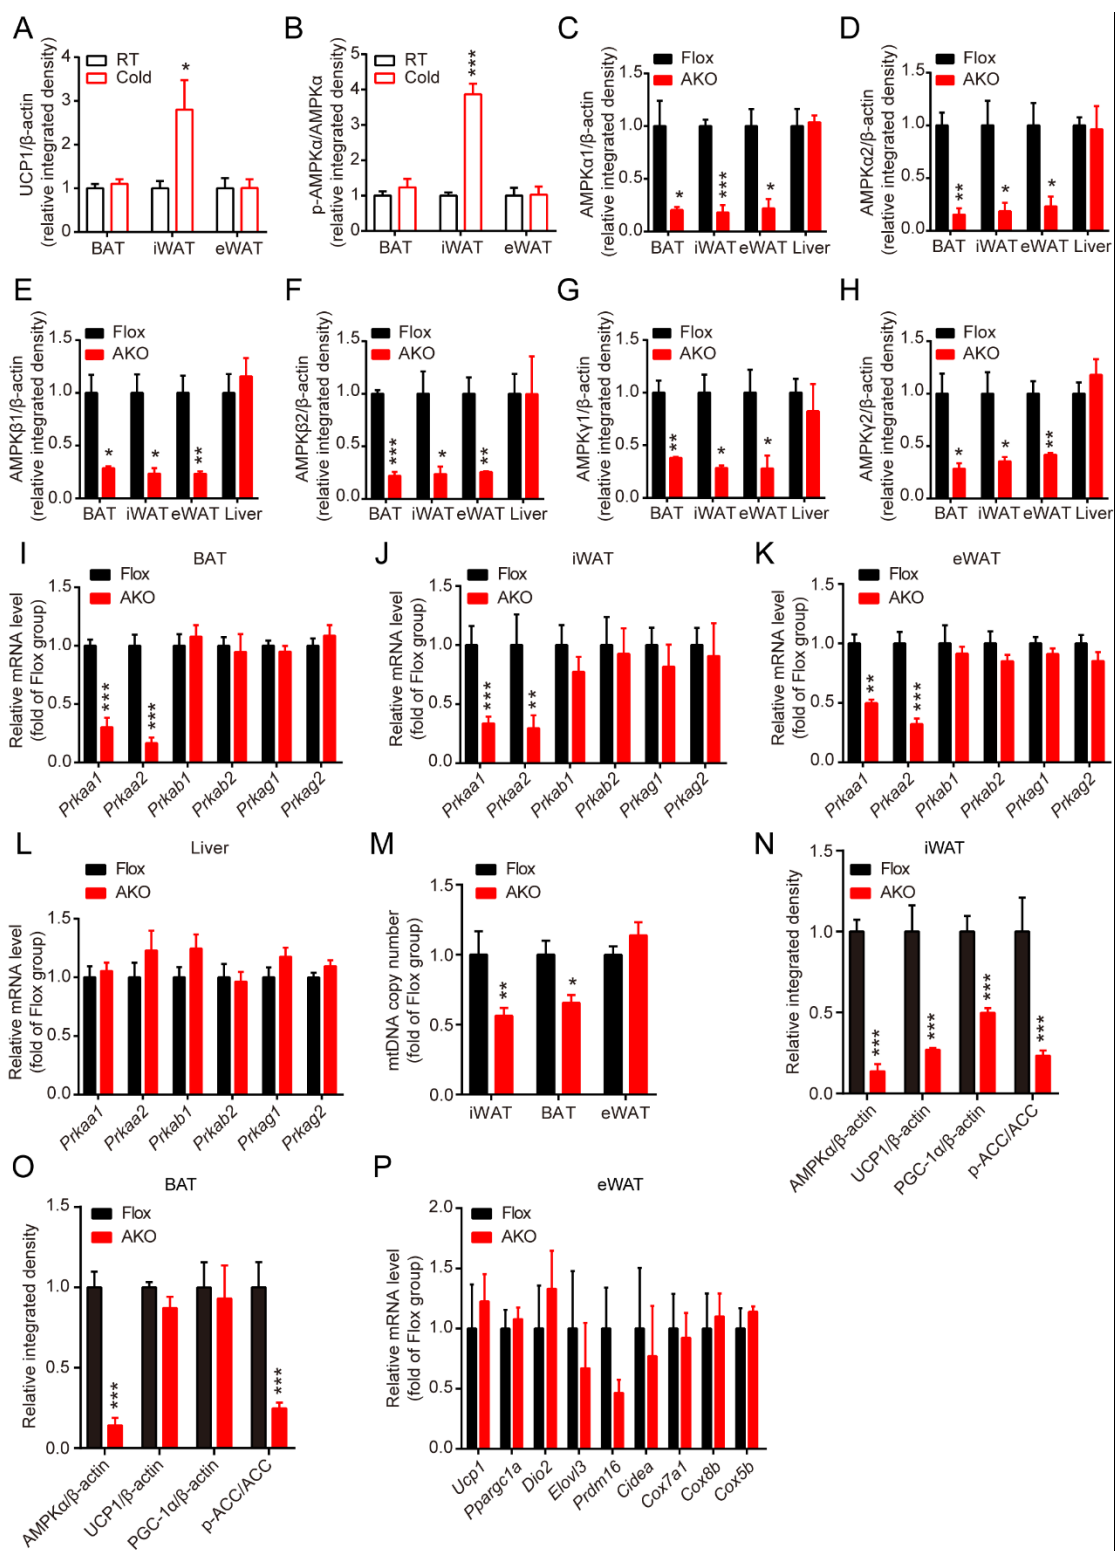

(figure legend on next page)

**Supplementary figure 1. Adipose AMPK $\alpha$  was required for cold-induced browning in iWAT.** (A-B) Densitometric quantification of immunoblots shown in Figure 1A. n = 4. (C-H) Densitometric quantification of immunoblots shown in Figure 1B. n = 3. (I-L) The mRNA levels of *Prkaa1*, *Prkaa2*, *Prkab1*, *Prkab2*, *Prkag1* and *Prkag2* in BAT (I), iWAT (J), eWAT (K) (normalized to *36b4*) and liver (L) (normalized to *Actb*) of chow-fed AKO mice and age-matched floxed mice. n = 8-12. (M) 8-week-old male chow-fed AKO mice and floxed mice were housed at 4 °C for 48 h. Mitochondrial DNA copy number of iWAT, eWAT and BAT in AKO mice and age-matched floxed littermates were determined. (N) Densitometric quantification of immunoblots shown in Figure 1L. n = 3. (O) Densitometric quantification of immunoblots shown in Figure 1M. n = 3. (P) 8-week-old male chow-fed AKO mice and floxed mice were housed at 4 °C for 48 h. Relative mRNA levels of thermogenic genes in eWAT are shown. n = 9. Data are presented as the means  $\pm$  SEM. Student's t test. \*P < 0.05, \*\*P < 0.01, \*\*\*P < 0.001 compared with the indicated control group.

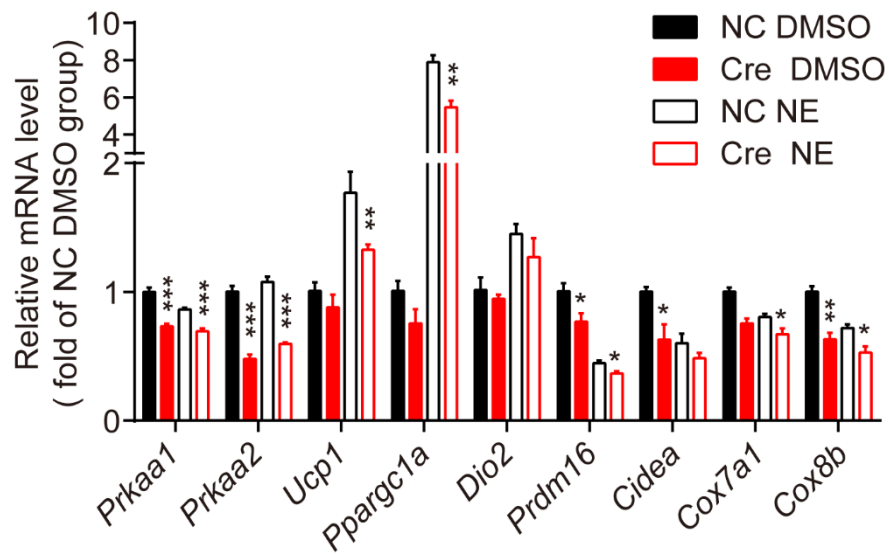

**Supplementary figure 2. AMPK $\alpha$  was essential for NE-induced thermogenic genes induction in differentiated iWAT-SVF cells.** Inguinal stromal vascular fraction (iWAT-SVF) cells were isolated from iWAT of 5-week-old AMPK  $\alpha$ 1/ $\alpha$ 2-floxed mice and induced to differentiate towards beige adipocytes. Cells were infected with NC and Cre adenovirus on day 6 to knockdown AMPK $\alpha$  expression and were treated with NE (10  $\mu$ M) on day 8 for 6 h. Relative mRNA levels of the indicated genes in iWAT-SVF cells on day 8 were determined by real time Q-PCR. n = 4. Data are presented as the means  $\pm$  SEM. Student's t test. \*P < 0.05, \*\*P < 0.01, \*\*\*P < 0.001 compared with the indicated control group.

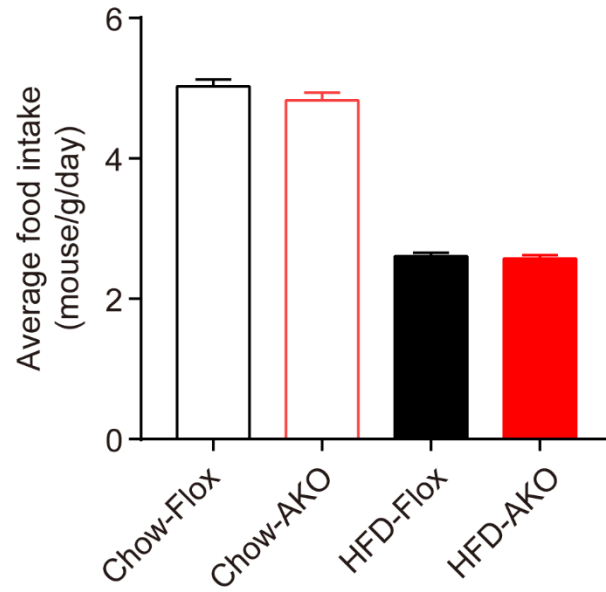

**Supplementary figure 3. Deletion of adipocyte AMPK $\alpha$  had no effect on food intake in chow- or HFD-fed mice.** Average food intake of AKO mice and age-matched floxed mice fed a chow diet or a HFD during the indicated period. n = 11-15. Data are presented as the means  $\pm$  SEM.

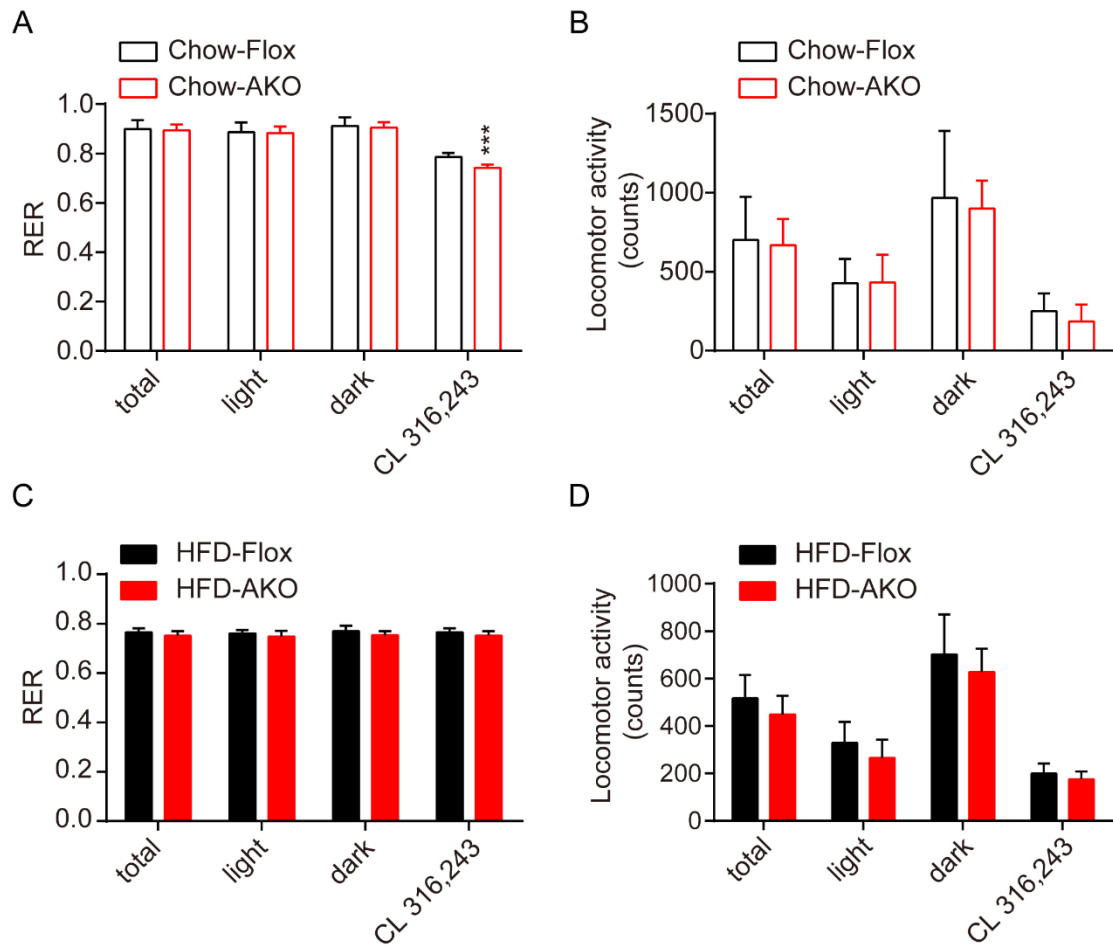

**Supplementary figure 4. Effect of adipocyte AMPK $\alpha$  deletion on RER and locomotor activity in AKO mice and floxed mice fed a chow diet or a HFD. (A and C) Average basal and CL 312,643-stimulated RER of AKO mice and floxed mice fed a chow diet (A) or a HFD (C). (B and D) Average basal and CL 312,643-stimulated locomotor activity of AKO mice and floxed mice fed a chow diet (B) or a HFD (D). n = 8. Data are presented as the means  $\pm$  SEM. Student's t test. \*\*\*P < 0.001 compared with the indicated control group.**

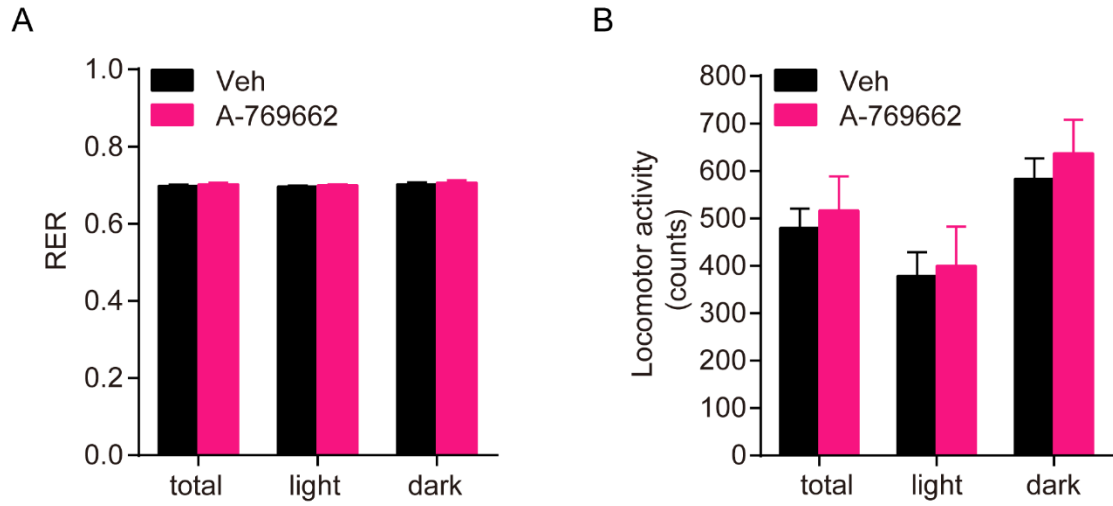

**Supplementary figure 5. Chronic A-769662 treatment had no influence on RER and locomotor activity of HFD-fed mice. (A-B)** Average RER (A) and locomotor activity (B) of HFD-fed mice was assessed during a 12-h light-dark cycle after 4 weeks of treatment. n = 8. Data are presented as the means  $\pm$  SEM.

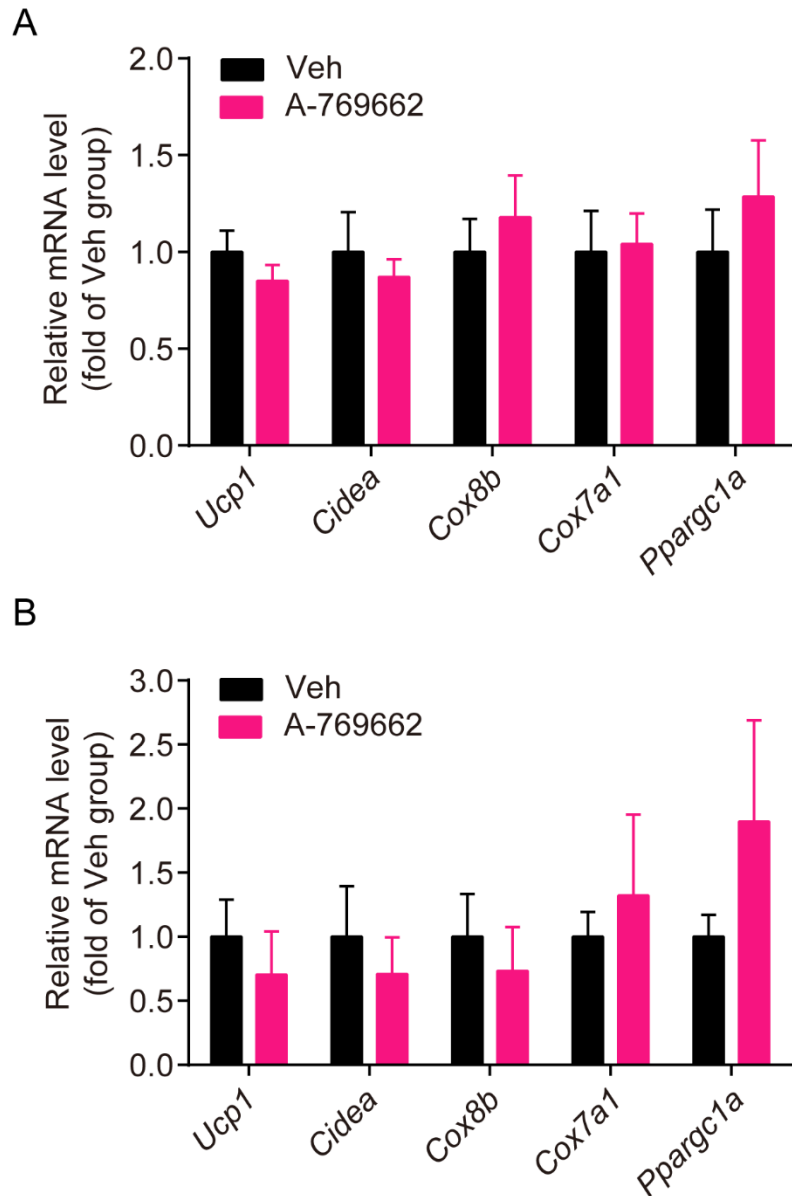

**Supplementary figure 6. Chronic A-769662 treatment had no effect on the expression of thermogenic genes in eWAT or BAT of HFD-fed mice. (A-B) Relative mRNA levels of thermogenic genes in BAT (A) and eWAT (B) of HFD-fed mice after 6 weeks of treatment. n = 6-7. Data are presented as the means  $\pm$  SEM.**

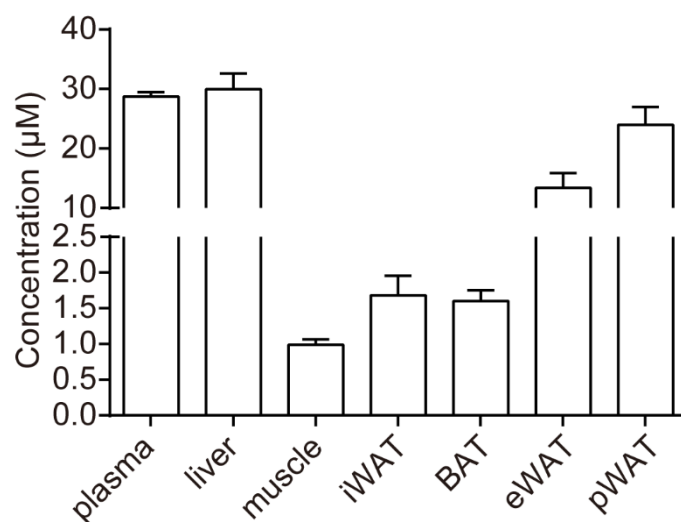

**Supplementary figure 7. Tissue distribution of A-769662 in HFD-fed mice.** The concentration of A-769662 in different tissues at 1 h after a single dose of i.p. injection of A-769662 (30 mg/kg) in male HFD-fed mice. The plasma and tissue samples were collected and the compound concentrations were determined by LC-MS/MS. n = 3. Data are presented as the means  $\pm$  SEM.



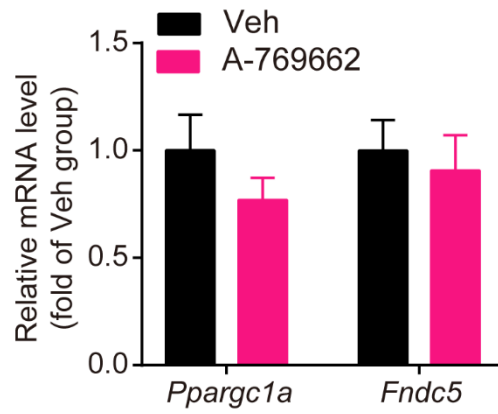

**Supplementary figure 8. Effect of A-769662 treatment on gene expression of *Ppargc1a* and *Fndc5* in skeletal muscle of HFD-fed mice.** The mRNA levels of *Ppargc1a* and *Fndc5* in skeletal muscle after 6 weeks of treatment (normalized to *Tubulin*). n= 9-10. Data are presented as the means  $\pm$  SEM.

**Supplementary table 1.** The sequences of primers used in real time Q-PCR (mouse).

| Genes                  | Sequence                  |
|------------------------|---------------------------|
| <i>36b4</i> forward    | TTTGGGCATCACCACGAAAA      |
| <i>36b4</i> reverse    | GGACACCCTCCAGAAAGCGA      |
| <i>Tubulin</i> forward | TAGCAGAGATCACCAATGCC      |
| <i>Tubulin</i> reverse | GGCAGCAAGCCATGTATTTA      |
| <i>Actb</i> forward    | CACTGTCGAGTCGCGTCC        |
| <i>Actb</i> reverse    | TCATCCATGGCGAACTGGTG      |
| <i>Prkaa1</i> forward  | AAAGTGAAGGTGGGCAAGCA      |
| <i>Prkaa1</i> reverse  | CAGATGGTGTACTGATGACCTGG   |
| <i>Prkaa2</i> forward  | TCGCAGTTTAGATGTTGTTGGA    |
| <i>Prkaa2</i> reverse  | CTTCAACCCGCCCATGTTTG      |
| <i>Prkab1</i> forward  | TTCTTGTGTCCCTGCAGATT      |
| <i>Prkab1</i> reverse  | CCTCTTTCTCTGGAGCCTTGAT    |
| <i>Prkab2</i> forward  | TGGCAGCAGGATTTGGATGAT     |
| <i>Prkab2</i> reverse  | AGGATGGCAACGAAGTCATTATG   |
| <i>Prkag1</i> forward  | AATGAACACTTTCAAGAGACCCC   |
| <i>Prkag1</i> reverse  | CCAACCTGGAACTTGTGGGAAT    |
| <i>Prkag2</i> forward  | GTTGTCTTCGACACTACGTTGC    |
| <i>Prkag2</i> reverse  | ACTCCCTCCACGTTTCAATCTT    |
| <i>Ucp1</i> forward    | ACTGCCACACCTCCAGTCATT     |
| <i>Ucp1</i> reverse    | CTTTGCCTCACTCAGGATTGG     |
| <i>Pparg1a</i> forward | ACTGAGCTACCCTTGGGATG      |
| <i>Pparg1a</i> reverse | TAAGAATTTTCGGTGGTGACA     |
| <i>Cox8b</i> forward   | GAACCATGAAGCCAACGACT      |
| <i>Cox8b</i> reverse   | GCGAAGTTCACAGTGGTTCC      |
| <i>Cox7a1</i> forward  | CAGCGTCATGGTCAGTCTGT      |
| <i>Cox7a1</i> reverse  | AGAAAACCGTGTGGCAGAGA      |
| <i>Cox5b</i> forward   | GCTGCATCTGTGAAGAGGACAAC   |
| <i>Cox5b</i> reverse   | CAGCTTGTAATGGGTTCCACAGT   |
| <i>Pparg1b</i> forward | GTCCCTGGCTGACATTCACT      |
| <i>Pparg1b</i> reverse | GCACGGATCTCATGGTCTCT      |
| <i>Prdm16</i> forward  | CAGCACGGTGAAGCCATTC       |
| <i>Prdm16</i> reverse  | GCGTGCATCCGCTTGTG         |
| <i>Cidea</i> forward   | TGCTCTTCTGTATCGCCCAGT     |
| <i>Cidea</i> reverse   | GCCGTGTTAAGGAATCTGCTG     |
| <i>aP2</i> forward     | ACACCGAGATTTCTTCAAACCTG   |
| <i>aP2</i> reverse     | CCATCTAGGGTTATGATGCTCTTCA |
| <i>Cpt1b</i> forward   | GCACACCAGGCAGTAGCTTT      |
| <i>Cpt1b</i> reverse   | CAGGAGTTGATTCCAGACAGGTA   |
| <i>Lcad</i> forward    | TCACCAACCGTGAAGCTCGA      |
| <i>Lcad</i> reverse    | CCAAAAAGAGGCTAATGCCATG    |
| <i>Oplah</i> forward   | CTTCACGCACGTCTCCTTGT      |
| <i>Oplah</i> reverse   | GCATCTGCACAGGCCGTAT       |

|                                            |                              |
|--------------------------------------------|------------------------------|
| <i>Fbxo31</i> forward                      | AAACTGCTTCACCGATACAGAC       |
| <i>Fbxo31</i> reverse                      | ACCACGACG TTCAGCAATCC        |
| <i>Acot2</i> forward                       | ATGGTGGCCTCGTCTTTTCG         |
| <i>Acot2</i> reverse                       | GAGCGGCGGAGGTACAAAC          |
| <i>Ebf3</i> forward                        | CGAAAGGACCGCTTTTGTGG         |
| <i>Ebf3</i> reverse                        | AGTGAATGCCGTTGTTGGTTT        |
| <i>Hspb7</i> forward                       | GAGCATGTTTTTCAGACGACTTTG     |
| <i>Hspb7</i> reverse                       | CCGAGGGTCTTGATGTTTCCTT       |
| <i>Slc29a1</i> forward                     | CACCAGCCTCAGGACAGGTAT        |
| <i>Slc29a1</i> reverse                     | GTCCAGGCGGTTTGTGAAA          |
| <i>Fndc5</i> forward                       | ATGAAGGAGATGGGGAGGAA         |
| <i>Fndc5</i> reverse                       | GCGGCAGAAGAGAGCTATAACA       |
| <i>Gck</i> forward                         | TGAGCCGGATGCAGAAGGA          |
| <i>Gck</i> reverse                         | GCAACATCTTTACTGTCCT          |
| <i>Me1</i> forward                         | GTCGTGCATCTCTCACAGAAG        |
| <i>Me1</i> reverse                         | TGAGGGCAGTTGGTTTTATCTTT      |
| <i>Fasn</i> forward                        | GGAGGTGGTGATAGCCGGTAT        |
| <i>Fasn</i> reverse                        | TGGGTAATCCATAGAGCCCAG        |
| <i>Acc1</i> forward                        | TCTACGGCAGCAGTTACACCACAT     |
| <i>Acc1</i> reverse                        | TCTCTTCATTACCTCAATCTCAGCATAG |
| <i>Scd1</i> forward                        | CAGGTTTCCAAGCGCAGTTC         |
| <i>Scd1</i> reverse                        | ACTGGAGATCTCTTGGAGCA         |
| <i>Acta2</i> forward                       | TGGCCACTGCTGCTTCCTCTTCTT     |
| <i>Acta2</i> reverse                       | GGGGCCAGCTTCGTCATA CTCCT     |
| <i>Colla1</i> forward                      | CAAGGTCCTTCTGGATCAAGTG       |
| <i>Colla1</i> reverse                      | CCTTTATGCCTCTGTACCTTG        |
| <i>Ctgf</i> forward                        | CAAGGACCGCACAGCAGTT          |
| <i>Ctgf</i> reverse                        | AGAACAGGCGCTCCACTCTG         |
| <i>Mmp2</i> forward                        | CTGGCATCCTCTTGTTGCTA         |
| <i>Mmp2</i> reverse                        | AGGGATCTCCAGGTGCACAA         |
| <i>Timp1</i> forward                       | CACGGGCGCCTAAGGAACG          |
| <i>Timp1</i> reverse                       | GGTCATCGGGCCCCAAGGGA         |
| <i>16S rRNA</i> forward                    | CCGCAAGGGAAAGATGAAAGAC       |
| <i>16S rRNA</i> reverse                    | TCGTTTGGTTTCGGGGTTTC         |
| <i>Hexokinase 2 gene, intron 9</i> forward | GCCAGCCTCTCCTGATTTTAGTGT     |
| <i>Hexokinase 2 gene, intron 9</i> reverse | GGGAACACAAAAGACCTCTTCTGG     |

---
